# Supplementary material for: Comparison of Frailty and Chronological Age as Determinants of the Murine Gut Microbiota in an Alzheimer’s Disease Mouse Model
Source: MDPI journal article supplement (doi:10.3390/microorganisms11122856), 2023-11-24
Supplement: s1 [file s1]

| Parameter                                                     | Pearson r | P value |
|---------------------------------------------------------------|-----------|---------|
| average velocity                                              | -0.004087 | 0.9800  |
| duration of movement                                          | -0.07067  | 0.6648  |
| traveled distance                                             | -0.008743 | 0.9573  |
| rearing frequency                                             | -0.08106  | 0.6190  |
| percentage of time spent moving during a period of 10 minutes | -0.2432   | 0.1305  |

**Suppl. Table S2: Parameters measured in the open field arena in wild type littermates.** Data of 40 mice were used for correlation analysis with chronological age. None of the parameters achieved statistical significance.
