# Supplementary material for: Comparison of Frailty and Chronological Age as Determinants of the Murine Gut Microbiota in an Alzheimer’s Disease Mouse Model
Source: MDPI journal article supplement (doi:10.3390/microorganisms11122856), 2023-11-24
Supplement: s1 [file s1]

| <b>Parameter</b>             | <b>Assessed</b>           |
|------------------------------|---------------------------|
| Alopecia (back)              | In home cage              |
| Dermatitis (back)            | In home cage              |
| Fur condition (back)         | In home cage              |
| Gait safety                  | In home cage              |
| Tremor                       | In home cage              |
| Hearing function             | In home cage              |
| Head posture                 | In home cage              |
| Microphthalmia/ Exophthalmia | In home cage              |
| Cataract                     | In home cage              |
| Jaundice                     | In home cage              |
| Breathing rate/ depth        | In home cage              |
| Tumor (back)                 | In home cage when rearing |
| Overall body condition       | In home cage when rearing |
| Kyphosis                     | In home cage when rearing |
| Adiposity (size of abdomen)  | In home cage when rearing |
| Rectal prolapse              | Removal from cage         |
| Diarrhea                     | Removal from cage         |
| Alopecia (ventral)           | Removal from cage         |
| Dermatitis (ventral)         | Removal from cage         |
| Fur condition (ventral)      | Removal from cage         |
| Tumor (ventral)              | Removal from cage         |

|                 |                   |
|-----------------|-------------------|
| Genital prolaps | Removal from cage |
| Sniffing        | Removal from cage |
| Visual acuity   | Removal from cage |

**Suppl. Table S1: Schedule of examination of mice.**

Parameters that were singly observed for back – and ventral side of the mouse were combined in the heatmaps as e.g., fur condition in general.
