# Supplementary material for: Comparison of Frailty and Chronological Age as Determinants of the Murine Gut Microbiota in an Alzheimer’s Disease Mouse Model
Source: MDPI journal article supplement (doi:10.3390/microorganisms11122856), 2023-11-24
Supplement: s1 [file s1]

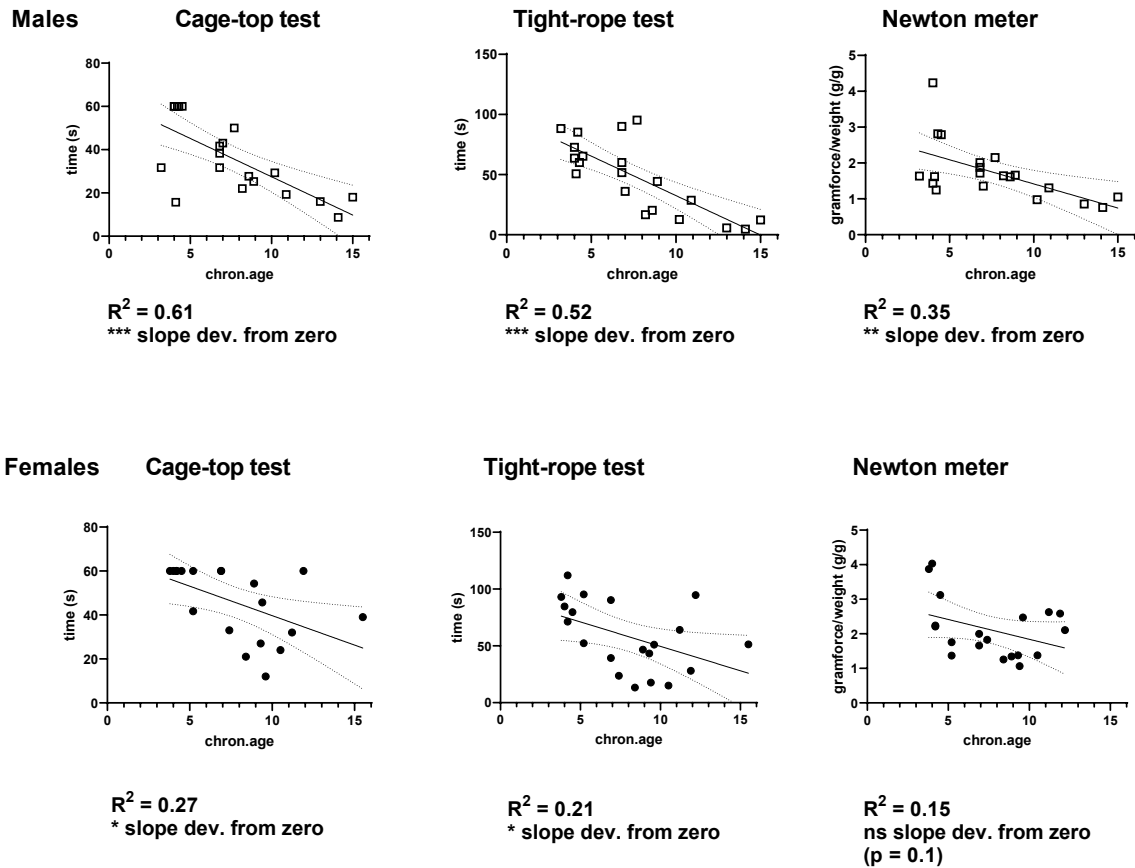

**Suppl. Fig. S2: Assessment of locomotive functional decline in aged male and female wild type mice.**

The three grip strength tests were applied on wild type littermates and correlation with chronological age investigated. Linear regression was performed and 95% confidence interval is indicated by dashed lines. Outlier analysis was performed with ROUT method and  $Q = 1\%$ ; one outlier had to be removed from female values for cage-top test and Newtonmeter testing ( $n=19-20$  per group).
