# Supplementary material for: Comparison of Frailty and Chronological Age as Determinants of the Murine Gut Microbiota in an Alzheimer’s Disease Mouse Model
Source: Microorganisms. 2023 Nov 24;11(12):2856. doi: 10.3390/microorganisms11122856 (PMC10745811; doi:10.3390/microorganisms11122856)
Supplement: Supplementary file 1 [file microorganisms-11-02856-s001.zip]

Archive with 4 entries (4 files):
- Suppl. Figure S1.pdf
- Suppl. Figure S2.pdf
- Suppl. Table S1.pdf
- Suppl. Table S2.pdf
